# Supplementary material
Source: Research Square preprint supplement (doi:10.21203/rs.3.rs-9057871/v1)
Supplement: Supplementary file 1 [file a777c92b09212a985d0b510f.xlsx]

## Sheet: PSYCHOSOCIAL SUPPORT AND QUA...
start	end	Age	Gender	Marital status	Educational level	Occupation	Type of cancer	Stage of cancer	Duration since diagnosis	Current treatment	I found it hard to wind down	I was aware of dryness of my mouth	I couldn’t seem to experience any positive feeling at all	I experienced breathing difficulty	I felt that I was using a lot of nervous energy	I felt down-hearted and blue	I found it difficult to work up the initiative to do things	I tended to over-react to situations	I felt scared without any good reason	I felt that life was meaningless	I felt close to panic	felt I was rather touchy	I felt I was not worth much as a person	I felt that I was rather intolerant of others	I felt nervous	I found myself getting agitated	I felt sad and depressed	I experienced trembling (e.g., in the hands)	I felt that I was not able to control important things in my life	I was worried about situations in which I might panic and make a fool of myself	I felt that I had nothing to look forward to	How would you rate your overall physical health?	To what extent do you have enough energy for daily life?	How much pain or discomfort have you experienced?	How much do you enjoy life?	How often do you feel depressed or anxious?	How meaningful do you feel your life is?	How satisfied are you with your personal relationships?	How satisfied are you with your support from friends/family?	How satisfied are you with your sexual life?	How satisfied are you with your access to healthcare?	How safe do you feel in your daily life?	How satisfied are you with your living conditions?	Are psychosocial support services available in this hospital?	Have you ever utilized any psychosocial support services (counselling, support groups, spiritual guidance,	How often do you receive support from family/friends during your illness?	How satisfied are you with the support you receive from healthcare professionals?	What type of support have you received?	What type of support have you received? /Emotional support
2025-10-18 12:38:53	2025-10-18 12:44:00	43	Female	Married	Secondary	Unemployed	Breast		Less than 6 months	Chemotherapy	3	3	3	0	0	2		3	0	0	2	3	0	0	3	1	3	0	3	0	0	1	1	5	3	2	5	5	5	1	5		5	Yes	Yes	Always	Very satisfied	Emotional support Financial support Information support Tangible assistance (e.g., transport, meals) Spiritual support	1
2025-10-18 12:44:00	2025-10-18 12:49:19	46	Female	Divorced	Tertiary	Employed	Cervical		1-2 years	Surgery	0	0	0	0	0	2	0	0	0	3	0	3	3	3	0	0	2	0	3	0	0	1	1	5	1	3	1	1	4	1	5	5	5	No	No	Sometimes	Dissatisfied	Emotional support Financial support Information support Tangible assistance (e.g., transport, meals) Spiritual support	1
2025-10-18 12:49:19	2025-10-18 12:56:55	32	Female	Married	Secondary	Employed	Breast		6-12 months	Surgery	0	3	0	0	0	0	0	0	0	0	0	0	0	0	0	0	0	0	0	0	0	2	5	1	5	1	5	5		5	5	5	5	No	Yes	Always	Very satisfied	Emotional support Financial support Information support Tangible assistance (e.g., transport, meals) Spiritual support	1
2025-10-18 12:56:55	2025-10-18 13:02:49	36	Female	Married	Secondary	Unemployed	Breast		Less than 6 months	Surgery	0	0	0	0	0	2	2	0	2	0	0	0	0	0	0	0	1	0	0	0	0	1	5	1	2	1	5	5	5	1	5	5	5	No	No	Always	Very satisfied	Emotional support Financial support Information support Tangible assistance (e.g., transport, meals) Spiritual support	1
2025-10-18 13:02:49	2025-10-18 13:08:48	39	Female	Single	Secondary	Unemployed	Breast	Stage II	1-2 years	Surgery	0	0	0	0	3	0	3	0	1	3	0	3	3	0	1	2		0	3	0	0	1	3	2	1	1	5	5	5	1	5	5	5	No	Yes	Always	Very satisfied	Emotional support Financial support Information support Tangible assistance (e.g., transport, meals) Spiritual support	1
2025-10-18 13:08:48	2025-10-18 13:12:11	31	Female	Married	Tertiary	Employed	Breast		1-2 years	Chemotherapy	0	0	0	0	0	0	0	0	0	0	0	0	0	0	0	0	0	0	0	0	0	5	5	3	5	1	5	5	5	5	5	5		I don't know	Yes	Always	Very satisfied	Emotional support Financial support Information support Tangible assistance (e.g., transport, meals) Spiritual support	1
2025-10-18 13:12:12	2025-10-18 13:16:33	69	Female	Married	Secondary	Unemployed	Cervical		1-2 years	Chemotherapy	0	0	0	0	2	2	0	0	0	0	0	0	0	0	0	2	1	0	0	0	0	1	2	5	3	1	5	5	5	1	5	5	5	I don't know	No	Always	Neutral	Emotional support Information support	1
2025-10-18 13:16:33	2025-10-18 13:25:29	47	Female	Married	Secondary	Employed	Breast		6-12 months	Radiotherapy	3	0	0	0	2	3	3	1	3	0	0	3	0	0	2	1	3	0	0	0	0	1	1	5	4	1	5	5	5	3	5	5	5	Yes	Yes	Always	Very satisfied	Emotional support Financial support Information support Tangible assistance (e.g., transport, meals) Spiritual support	1
2025-10-18 13:25:29	2025-10-18 13:29:29	73	Male	Married	Secondary	Retired	Prostate		More than 2 years	Chemotherapy	3	0	0	0	0	2	3	0	0	0	0	0	0	0	0	0	2	2	0	0	0	5	2	2	4	1	5	5	5	1	5	5	5	I don't know	No	Always	Very satisfied	Emotional support Financial support Information support Tangible assistance (e.g., transport, meals) Spiritual support	1
2025-10-18 13:29:29	2025-10-18 13:34:58	24	Male	Single	Tertiary	Student	Others		Less than 6 months	Surgery	3	1	3	0	0	0	0	1	1	0	0	3	0	1	0	2	0	2	0	0	3	2	5	2	2	1	4	4		3	5		4	I don't know		Sometimes	Neutral	Information support	0
2025-10-18 13:34:59	2025-10-18 13:41:14	60	Female	Widowed	No formal education	Employed	Cervical		Less than 6 months	Chemotherapy	3	3	0	0	3	3	3	1	2	0	1	1	0	0	2	3	1	0	0	0	0	1	1	5	1	1	5	5		1	5	5	5	No	No	Always	Very dissatisfied	Emotional support Financial support Information support Tangible assistance (e.g., transport, meals) Spiritual support	1
2025-10-18 13:41:14	2025-10-18 16:45:46	65	Female	Married	Secondary	Employed	Others		Less than 6 months	Chemotherapy	3	0	0	0	0	2	0	0	2	0	0	0	0	0	1	0	2	0	1	3	0	2	1	2	1	1	5	5	5	1	5	5	5	I don't know	Yes	Always	Very satisfied	Emotional support Financial support Information support Tangible assistance (e.g., transport, meals) Spiritual support	1
2025-10-18 16:45:46	2025-10-18 16:49:49	50	Female	Married	Tertiary	Employed	Others		Less than 6 months	Chemotherapy	0	0	0	0	3	3	0	0	2	0	0	0	0	0	1	1	1	0	1	0	0	2	4	2	4	1	4	5	5	1	1	4	1	Yes	Yes	Always	Very satisfied	Emotional support Financial support Information support Tangible assistance (e.g., transport, meals) Spiritual support	1
2025-10-18 16:49:50	2025-10-18 16:56:52	78	Male	Married	Tertiary	Retired	Others	Stage IV	1-2 years	Surgery	3	0	2	0	0	3	0	0	3	0	2	0	0	0	1	1	1	0	1	1	0	1	1	5	3	2	4	5	5	1	5	5	3	Yes	Yes	Always	Very satisfied	Emotional support Financial support Information support Tangible assistance (e.g., transport, meals)	1
2025-10-18 16:56:52	2025-10-18 23:36:59	52	Female	Married	Secondary	Student	Others	Stage IV	Less than 6 months	Surgery	1	0	0	0	2	0	0	0	1	0	0	0	0	0	1	0	0	0	0	0	0	1	1	2	1	1	1	5	5	1	5	5	5	Yes	Yes	Always	Very satisfied	Emotional support Financial support Information support Tangible assistance (e.g., transport, meals) Spiritual support	1
2025-10-18 23:36:59	2025-10-18 23:49:54	65	Male	Married	Primary	Employed	Prostate		Less than 6 months	Surgery	0	0	1	0	0	0	3	0	0	0	0	0	0	0	0	0	0	3	1	0	0	1	1	1	1	1	5	5	5	1	5	5	5	Yes	Yes	Always	Very satisfied	Emotional support Financial support Information support Tangible assistance (e.g., transport, meals) Spiritual support	1
2025-10-18 23:49:54	2025-10-19 06:41:58	27	Male		Tertiary	Student	Others	Stage III	Less than 6 months	Chemotherapy	3	3	0	0	2	2	0	0	0	0	0	0	0	0	1	1	1	0	0	1	0	1	5	1	1	2	1	5	5	1	4	5	1	Yes	Yes	Always	Very satisfied	Emotional support Information support Tangible assistance (e.g., transport, meals) Spiritual support	1
2025-10-19 06:41:59	2025-10-19 06:45:58	70	Male	Married	Tertiary	Employed	Others	Stage III	1-2 years	Chemotherapy	0	0	0	0	0	3	3	0	0	0	0	0	0	0	0	0	0	0	3	3	0	1	3	1	1	1	1	5	5	1	1	5	1	Yes	Yes	Always	Very satisfied	Emotional support Financial support Information support Tangible assistance (e.g., transport, meals) Spiritual support	1
2025-10-19 06:45:58	2025-10-19 11:54:55	75	Male	Married	Secondary	Retired	Prostate		6-12 months	Surgery	3	1	2	3	0	3	0	0	0	0	0	0	0	3	3	2	1	3	3	3	0	1	1	1	1	1	1	5	5	1	5	2	1	Yes	Yes	Always	Very satisfied	Emotional support Financial support Information support Tangible assistance (e.g., transport, meals) Spiritual support	1
2025-10-19 11:54:55	2025-10-19 11:59:02	47	Male	Married	Secondary	Employed	Others		More than 2 years	Surgery	0	0	0	0	0	0	0	0	0	0	0	0	0	3	0	0	0	0	0	0	0	1	5	5	5	1	5	5	5	1	5	5	5	Yes	Yes	Always	Very satisfied	Emotional support Financial support Information support Spiritual support	1
2025-10-19 11:59:03	2025-10-19 12:03:07	1987	Male	Single	Secondary	Employed	Others		6-12 months	Surgery	3		0	0	2	0	0	0	1	0	1	0	0	0	1	1	1	0	0	1	0	1	5	5	3	1	5	5	5	1	5	5	1	Yes	Yes	Always	Satisfied	Emotional support Financial support Information support Tangible assistance (e.g., transport, meals) Spiritual support	1
2025-10-19 12:03:08	2025-10-19 12:06:21	42	Male	Married	Tertiary	Employed	Others		Less than 6 months		3	0	0	0	0	3	3	0	3	0	2	0	0	3	3	3	3	0	3	3	0	1	1	1	1	4	5	5	1	1	5	5	1	Yes	Yes	Always	Satisfied	Emotional support Financial support Information support Tangible assistance (e.g., transport, meals)	1
2025-10-19 12:06:21	2025-10-19 12:11:26	27	Male	Single	Tertiary	Employed	Others		Less than 6 months		3	0	0	0	3	3	3		2	0	1	0	0	0	2	2	3	0	0	2	0	1	1	5	1	5	5	5	5	5	5	5	5	Yes	Yes	Always	Very satisfied	Emotional support Financial support Information support Tangible assistance (e.g., transport, meals) Spiritual support	1
2025-10-19 12:11:26	2025-10-19 12:14:06	64	Male	Married	Primary	Employed	Others		1-2 years	Radiotherapy	0	0	0	0	0	0	0	0	0	0	0	0	0	0	0	0	0	0	0	0	0	2	5	5	5	1	1	5	5	1	5	5	5	Yes	Yes	Always	Very satisfied	Emotional support Financial support Information support Tangible assistance (e.g., transport, meals) Spiritual support	1
2025-10-19 12:14:07	2025-10-20 12:44:33	30	Female	Married	Secondary	Employed	Others		6-12 months	Surgery	0	0	0	0	3	1	0	0	1	0	1	0	0	0	1	0	1	0	1	1	0	5	5	2	3	5	5	5	5	5	5	5	5	Yes	Yes	Always	Very satisfied	Emotional support Financial support Information support Tangible assistance (e.g., transport, meals) Spiritual support	1
2025-10-20 12:44:34	2025-10-20 12:48:52	54	Female	Married	Secondary	Employed	Others	Stage IV	More than 2 years	Chemotherapy	3	0	0	0	0	3	3	0	3	0	2	0	0	0	2	0	2	0	2	0	0	4	5	4	5	3	1	4	4	1	4	4	3	Yes	Yes	Always	Very satisfied	Emotional support Financial support Information support Tangible assistance (e.g., transport, meals) Spiritual support	1
2025-10-20 12:48:52	2025-10-20 12:55:59	42	Female	Married	Secondary	Employed	Breast		1-2 years	Surgery	3	0	3	1	0	0	3	0	0	3	0	0	0	2	0	0	0	0	0	0	0	1	2	1	1		1	5	4	1	5	5	2	I don't know	No	Always	Very satisfied	Emotional support Financial support Information support Tangible assistance (e.g., transport, meals) Spiritual support	1
2025-10-20 12:55:59	2025-10-20 13:01:35	33	Female	Single	Tertiary	Employed	Breast		6-12 months	Chemotherapy	3	0	3	0	2	3	3	0	2	0	3	0	0	0	3	3	3	0	3	3	0	3	2	4	1	1		5	5	1	5	5	1	Yes	Yes	Always	Satisfied	Emotional support Financial support Information support Tangible assistance (e.g., transport, meals) Spiritual support	1
2025-10-20 13:01:36	2025-10-20 13:04:47	80	Female	Married	Secondary	Employed	Breast		More than 2 years	Chemotherapy	3	0	0	0	3	3	3	0	3	3	3	3	0	3	3	3	3	0	3	3
2025-10-20 13:04:48	2025-10-20 13:11:17	42	Female	Single	Secondary	Employed	Others		6-12 months	Chemotherapy	3	0	0	3	3	3	3	3	2	0	1	0	1	0	2	1	1	0	1	1	0	1	2	5	2	3	4	1	1	1	1	3	5	I don't know	Yes	Always	Very satisfied	Emotional support Financial support Information support Tangible assistance (e.g., transport, meals) Spiritual support	1
2025-10-20 13:11:18	2025-10-20 13:17:09	66	Male	Married	Primary	Unemployed	Others		1-2 years	Chemotherapy	3	0	0	0	1	1	0	0	0	0	0	0	0	0	0	1	1	2	0	0	0	1	1	2	1	2	1	5	5	1	5	3	5	Yes	Yes	Always	Very satisfied	Emotional support Financial support Information support Tangible assistance (e.g., transport, meals) Spiritual support	1
2025-10-20 13:17:09	2025-10-20 13:21:14	80	Female	Married	Secondary	Retired	Breast		More than 2 years		0	1	2	0	0	2	0	0	0	0	0	0	0	0	0	0	1	0	0	0	0	1	5	5	3	1	1	2	5	1	5	5	3	I don't know	Yes	Always	Neutral	Emotional support Financial support Information support Tangible assistance (e.g., transport, meals) Spiritual support	1
2025-10-20 13:21:15	2025-10-20 13:26:08	48	Female	Married	Secondary	Employed	Cervical	Stage O	Less than 6 months	Chemotherapy	3	0	3	0	3	0	0	0	0	0	0	0	0	0	1	0	0	0	0	0	0	4	1	1	5	1	1	5	5	5	5	5	5	Yes	Yes	Always	Very satisfied	Emotional support Financial support Information support Tangible assistance (e.g., transport, meals) Spiritual support	1
2025-10-20 13:26:08	2025-10-20 13:31:02	29	Female	Single	Tertiary	Student	Others		Less than 6 months	Chemotherapy	3	1	0	1	0	2	2	0	0	0	0	0	0	0	0	0	0	1	2	0	0	1	2	1	1	1	5	5	4	1	3	5	4	Yes	Yes	Often	Satisfied	Emotional support Financial support Information support Tangible assistance (e.g., transport, meals) Spiritual support	1
2025-10-20 13:31:02	2025-10-20 13:34:19	60	Female	Married	Secondary	Employed	Others		1-2 years	Surgery	2	0	3	0	0	0	0	0	0	0	0	0	0	0	0	0	0	0	0	0	0	1	5	1	5	1	1	5	5	1	1	1	1	Yes	Yes	Always	Very satisfied	Emotional support Financial support Information support Tangible assistance (e.g., transport, meals) Spiritual support	1
2025-10-20 13:34:19	2025-10-20 13:38:22	27	Female	Married	Secondary	Employed	Others		More than 2 years	Surgery	3	0	3	0	0	2	0	0	0	0	0	0	0	1	0	0	0	0	0	0	0	1	5	5	4	2	5	5	5	1	2	5	4	Yes	Yes	Sometimes	Satisfied	Emotional support	1
2025-10-20 13:38:22	2025-10-20 13:43:16	76	Female	Widowed	No formal education	Retired	Others		More than 2 years	Surgery	0	0	0	1	0	0	0	1	0	0	1	0	0	0	1	1	1	1	0	0	0	1	1	5	1	1	1	1	5	1	1	1	1	I don't know	No	Always	Very dissatisfied	Emotional support Financial support Tangible assistance (e.g., transport, meals) Spiritual support	1
2025-10-20 13:43:16	2025-10-20 13:49:19	39	Female	Married	Tertiary	Employed	Others		6-12 months	Chemotherapy	0	0	0	3	0	3	0	0	0	0	0	0	0	0	0	0	0	0	0	0	0	1	1	5	1	1	5	5	1					Yes	Yes	Always	Satisfied	Emotional support Financial support Information support Tangible assistance (e.g., transport, meals)	1
2025-10-20 13:49:19	2025-10-20 13:54:34	57	Female	Married	Secondary	Employed	Others		6-12 months		0	1	0	3	0	2	0	0	0	0	0	0	0	0	1	3	1	0	2	1	0	1	1		3	1	1	5	5	1	5	5	5	I don't know	Yes	Always	Very satisfied	Emotional support Financial support Information support Tangible assistance (e.g., transport, meals) Spiritual support	1
2025-10-20 13:54:34	2025-10-20 14:00:09	36	Female	Married	Secondary	Employed	Cervical		6-12 months	Surgery	3	0	0	0	0	2	0	0	0	0	0	0	0	0	0	0	1	0	0	0	0	1	2	5	5	1	1	5	5	1	5	5	4	Yes	Yes	Always	Very satisfied	Emotional support Financial support Information support Tangible assistance (e.g., transport, meals) Spiritual support	1
2025-10-20 14:00:09	2025-10-20 14:05:25	77	Male	Married	Secondary	Retired	Prostate		Less than 6 months	Radiotherapy	3	0	0	0	0	0	0	0	0	3	0	0	0	0	0	0	0	0	0	0	0	5	2	1	5	1	1	5	5	1	5	5	5	Yes	Yes	Always	Very satisfied	Emotional support Financial support Information support Tangible assistance (e.g., transport, meals) Spiritual support	1
2025-10-20 14:05:25	2025-10-20 14:08:47	85	Male	Married	Primary	Retired	Prostate			Radiotherapy	3	0	3	0	3	3	0	0	2	0	1	0	0	0	1	1	2	0	0	0	0	5	1	1	5	2	1	5	5	1	5	5	5	Yes	Yes	Always	Very satisfied	Emotional support Financial support Information support Tangible assistance (e.g., transport, meals) Spiritual support	1
2025-10-20 14:08:47	2025-10-20 14:12:09	42	Female	Married	Secondary	Employed	Breast	Stage II	More than 2 years	Radiotherapy	3	0	3	0	2	3	0	0	2	0	0	0	0	0	0	1	3	0	0	0	0	3	4	5	5		1	5	5	4	5	5	5	Yes	Yes	Always	Very satisfied	Emotional support Financial support Information support Tangible assistance (e.g., transport, meals) Spiritual support	1
2025-10-20 14:12:09	2025-10-20 14:15:43	51	Female	Married	Tertiary	Employed	Others		More than 2 years	Surgery	3	0	0	0	0	0	0	0	0	0	0	0	0	0	0	0	0	0	0	0	0	2	5	1	2	1	5	5	5	1	5	5	5	Yes	Yes	Always	Very satisfied	Emotional support Financial support Information support Tangible assistance (e.g., transport, meals) Spiritual support	1
2025-10-20 14:15:43	2025-10-20 14:19:28	60	Female	Married	Primary	Employed	Others		6-12 months	Chemotherapy	0	0	3	0	0	0	3	0	0	0	0	0	0	0	0	0	0	0	0	0	0	2	5	1	5	1	1	5	5	1	5	5	5	Yes	Yes	Always	Very satisfied	Emotional support Financial support Information support Tangible assistance (e.g., transport, meals) Spiritual support	1
2025-10-20 14:19:28	2025-10-20 14:22:10	32	Female	Married	Tertiary	Employed	Breast	Stage II	6-12 months	Surgery	3	0	3	0	0	0	3	0	0	0	0	0	0	0	0	0	0	0	0	0	0	1	5	4	5	1	1	5	5	5	5	5	5	Yes	Yes	Always	Very satisfied	Emotional support Financial support Information support Tangible assistance (e.g., transport, meals) Spiritual support	1
2025-10-20 14:22:10	2025-10-20 14:26:14	59	Male	Married	Primary	Employed	Breast		1-2 years		0	0	0	0	1	3	0	0	0	0	0	0	0	0	0	0	0	0	0	0	0	1	1	5	2	1	1	5	5	1	5	5	5	I don't know	Yes	Always	Very satisfied	Emotional support Financial support Information support Tangible assistance (e.g., transport, meals) Spiritual support	1
2025-10-20 14:26:15	2025-10-20 14:32:44	45	Female	Married	Tertiary	Employed	Others		6-12 months		0	0	0	0	0	0	3	0	0	0	0	0	0	0	0	0	0	0	0	0	0	1	5	2	5	1	1	5	5	1	5	5	5	I don't know	No	Always	Very satisfied	Emotional support Financial support Information support Tangible assistance (e.g., transport, meals) Spiritual support	1
2025-10-20 14:32:44	2025-10-20 14:36:38	20	Male	Single	Tertiary	Student	Others	Stage I	6-12 months	Chemotherapy	3	0	0	0	2	0	3	0	0	0	0	0	0	0	0	0	0	0	0	0	0	1	5	1	3	1	5	5	5	1	5	5	5	Yes	Yes	Always	Very satisfied	Emotional support Financial support Information support Tangible assistance (e.g., transport, meals) Spiritual support	1
2025-10-20 14:36:38	2025-10-20 14:39:55	40	Male	Married	Secondary	Employed	Others		Less than 6 months		0	0	2	0	0	0	0	0	0	0	0	0	0	0	0	0	0	0	0	0	0	1	5	5	4	1	5	5	5	4	5	5	5	No	No	Always	Very satisfied	Emotional support Financial support Information support Tangible assistance (e.g., transport, meals) Spiritual support	1
2025-10-20 14:39:55	2025-10-20 14:44:50	70	Female	Married	Tertiary	Retired	Others		Less than 6 months	Chemotherapy	0	0	0	0	2	2	3	0	0	0	0	0	0	0	0	0	0	2	0	0	0	1	2	4	4	1	5	5	5	1	5	5	5	Yes	Yes	Always	Very satisfied	Emotional support Financial support Information support Tangible assistance (e.g., transport, meals) Spiritual support	1
2025-10-20 14:44:50	2025-10-20 14:51:06	44	Female	Married	Tertiary	Employed	Breast		6-12 months	Chemotherapy	0	1	0	0	3	3	0	0	2	0	2	0	0	0	2	1	2	0	1	1	0	2	5	5	5	2	5	5	5	3		5	5	Yes	Yes	Always	Very satisfied	Emotional support Financial support Information support Tangible assistance (e.g., transport, meals) Spiritual support	1
2025-10-20 14:51:06	2025-10-20 15:00:03	52	Male	Married	Tertiary	Employed	Others	Stage III	More than 2 years	Combination		2	2	0	0	2	1	1	2	3	1	1	0	1	2	2	1	0	2	2	0	2	4	1	4	1	4	4	1	1	4	4	3	I don't know	Yes	Sometimes	Very satisfied	Spiritual support	0
2025-10-20 15:00:03	2025-10-20 15:04:10	65	Female	Widowed	Primary	Employed	Others		More than 2 years	Chemotherapy	0	0	0	0	0	0	0	0	0	0	0	0	0	0	0	0	0	0	0	0	0	1	2	5	4	2	5	5	5	5	5	5	5	Yes	Yes	Always	Very satisfied	Emotional support Financial support Information support Tangible assistance (e.g., transport, meals) Spiritual support	1
2025-10-20 15:04:10	2025-10-20 15:08:39	40	Female	Single	Secondary	Employed	Breast	Stage I		Chemotherapy	0	1	0	2	2	2	2	0	1	3	2	0	1	0	2	0	1	0	1	0	0	1	5	3	3	2	5	1	5		3	4	3	Yes	Yes	Always	Neutral	Emotional support Financial support Information support Spiritual support	1
2025-10-20 15:08:39	2025-10-20 15:14:01	41	Female	Married	Tertiary	Employed	Breast	Stage O	6-12 months	Chemotherapy	3	3	0	0	3	3	3	0	3	3	3	0	0	0	2	2	2	0	3	3	0	1	5	1	3	2	5	5	5	1	5	5	4	Yes	Yes	Sometimes	Satisfied	Emotional support Financial support Information support Tangible assistance (e.g., transport, meals) Spiritual support	1
2025-10-20 15:14:01	2025-10-20 15:18:50	40	Female	Married	Tertiary	Employed	Breast	Stage I	More than 2 years	Surgery	3	0	0	0	0	3	0	0	2	0	3	0	0	0	3	3	3	0	0	2	0	3	5	5	5	5	5	5	5	1	5	5	1	No	No	Always	Very satisfied	Emotional support Financial support Information support	1
2025-10-20 15:18:50	2025-10-20 15:22:10	62	Female		Tertiary	Employed	Breast		6-12 months	Chemotherapy	3	0	0	0	0	0	1	0	0	0	0	0	0	0	0	0	0	0	0	0	0	3	2	4	4	1	1	1	5	1	5	5	3	Yes	Yes	Always	Neutral	Emotional support Financial support Information support Tangible assistance (e.g., transport, meals) Spiritual support	1
2025-10-20 15:22:10	2025-10-20 15:26:25	54	Female	Married	Primary	Employed	Breast		6-12 months	Chemotherapy	2	0	0	0	2	3	0	0	2	0	0	0	0	0	0	0	0	0	0	0	0	5	5	1	1	5	1	5	5	1	1	1	1	I don't know	No	Always	Very satisfied	Emotional support Financial support Tangible assistance (e.g., transport, meals) Spiritual support	1
2025-10-20 15:26:25	2025-10-20 15:29:56	70	Female	Married	Primary	Employed	Breast			Chemotherapy	1	3	2	0	3	3	0	0	0	0	0	0	0	3	3	3	3	0	2	2	0	1	1	1	2		2	2	5	1	5	4	4	I don't know	Yes		Very satisfied	Emotional support Financial support Information support Tangible assistance (e.g., transport, meals)	1
2025-10-20 15:29:56	2025-10-20 22:33:13	31	Female	Married	Secondary	Employed	Breast		Less than 6 months		3	0	0	2	2	2	3	0	1	0	0	0	0	1	2	2			1	2	0	4	4	4	3	3	5	5	5	3	5	4	4	No	No	Always	Very satisfied	Emotional support Financial support	1
2025-10-20 22:33:13	2025-10-20 22:37:03	59	Female	Married	Primary	Employed	Breast		6-12 months	Surgery	3	0	3	0	3	3	0	1	2	0	1	0	0	0	2	1	2	0	0	0	0	4	5	4	4		4	4	4	1	4	5	5	No	No	Always	Neutral	Financial support Spiritual support	0
2025-10-20 22:37:03	2025-10-20 22:39:50	40	Female	Married	Secondary	Employed	Others	Stage I	6-12 months	Chemotherapy	0	0	0	0	0	0	0	0	0	0	0	0	0	0	0	0	0	0	0	2	0	5	5	3	3	1	5	5	5	5	5	5	5	Yes	Yes	Always	Very satisfied	Emotional support Financial support Information support Tangible assistance (e.g., transport, meals) Spiritual support	1
2025-10-20 22:39:50	2025-10-20 22:42:49	60	Female	Married	Primary	Employed	Others		6-12 months	Combination	0	0	2	0	0	0	0	0	0	0	0	0	0	0	0	0	0	0	0	0	0	4	4	4	5	1	1	1	5	5	5	5	5	Yes	No	Always	Very satisfied	Emotional support Financial support Information support Tangible assistance (e.g., transport, meals) Spiritual support	1
2025-10-20 22:42:49	2025-10-20 22:46:06	38	Female	Married	Tertiary	Employed	Breast	Stage II	6-12 months	Radiotherapy	0	3	0	0	2	3	3	0	0	0	1	3	0	0	1	0	2	0	0	0	0	4	5	4	4	2	5	4	5	4	5	5	5	I don't know	Yes	Always	Very satisfied	Emotional support Financial support Information support Tangible assistance (e.g., transport, meals) Spiritual support	1
2025-10-20 22:46:06	2025-10-20 22:49:21	65	Male	Married	Tertiary	Retired	Others		6-12 months	Chemotherapy	0	0	0	0	0	0	0	1	0	0	0	1	0	0	0	0	1	0	0	0	0	2	5	1	5	1	1	1	1	1	1	3	5	I don't know	No	Always	Very satisfied	Emotional support Financial support Information support Tangible assistance (e.g., transport, meals) Spiritual support	1
2025-10-20 22:49:21	2025-10-20 22:52:27	39	Female	Married	Secondary	Employed	Breast		Less than 6 months		0	0	0	0	0	0	3	0	0	0	0	0	0	0	0	0	0	0	0	0	0	1	5	1	5	1	5	1	5	4	5	5	5	I don't know	No	Always	Very satisfied	Emotional support Financial support Information support Tangible assistance (e.g., transport, meals) Spiritual support	1
2025-10-20 22:52:27	2025-10-20 22:56:58	28	Male	Single	Tertiary	Employed	Others		Less than 6 months	Chemotherapy	0	3	0	0	0	0	2	0	0	0	0	0	0	0	0	0	0		0	0	0	1	4	1	4	1	5	5	5	1	5	5	5	Yes	Yes	Always	Very satisfied	Emotional support Financial support Information support Tangible assistance (e.g., transport, meals) Spiritual support	1
2025-10-20 22:56:58	2025-10-20 23:00:46	43	Female	Married	Secondary	Employed	Breast		6-12 months	Chemotherapy	0	0	0	0	0	0	0	0	0	0	0	0	0	0	0	0	0	0	0	0	0	1	5	2	5	1	5	5	5	2	5	5	1	Yes	Yes	Always	Satisfied	Emotional support Financial support Information support Spiritual support	1
2025-10-20 23:00:46	2025-10-20 23:04:40	20	Male	Single	Secondary	Unemployed	Others		6-12 months	Surgery	0	0	0	0	0	2	0	0	1	0	0	3	0	3	1	2	1	0	0	0	0	1	2	5	1	1		5	3	1	5	5	5	No	No	Always	Neutral	Emotional support Financial support Information support Tangible assistance (e.g., transport, meals) Spiritual support	1
2025-10-20 23:04:41	2025-10-20 23:07:30	53	Female	Married	Secondary	Employed	Breast		6-12 months	Radiotherapy	0	0	0	0	0	0	0	0	0	0	0	0	0	0	0	0	0	0	0	0	0	2	5	1	4	1	4	5	5	1	1	1	1	Yes	Yes	Always	Very satisfied	Financial support Information support Spiritual support	0
2025-10-20 23:07:30	2025-10-20 23:12:39	66	Female	Widowed	No formal education	Employed	Cervical	Stage IV	1-2 years	Radiotherapy	0	0	0	0	0	3	0	1	3	0	3	3	0	0	3	2	3	0	1	3	0	2	1	4	1	5	5	5	5	1	5	5	5	Yes	Yes	Always	Very satisfied	Emotional support Financial support Information support Tangible assistance (e.g., transport, meals) Spiritual support	1
2025-10-20 23:12:39	2025-10-20 23:19:15	64	Female	Married	No formal education	Employed	Cervical	Stage III	More than 2 years	Radiotherapy	3	0	0	0	0	3	3	0	0	0	0	0	0	2	3	3	3	0	0	0	0	2	1	5	3	2	5		5	1	5	5	5	Yes	Yes	Always	Very satisfied	Emotional support Financial support Information support Tangible assistance (e.g., transport, meals) Spiritual support	1
2025-10-20 23:19:16	2025-10-20 23:22:44	52	Female	Single	Tertiary	Employed	Breast		6-12 months	Radiotherapy	3	0	0	0	1	2	3	2	3	0	0	0	0		1	1	1	0	0	0	0	1	2	3	3	1	5	5	5	1	5	5	5	Yes	Yes	Always	Very satisfied	Emotional support Financial support Information support Tangible assistance (e.g., transport, meals) Spiritual support	1
2025-10-20 23:22:44	2025-10-21 00:57:45	55	Female	Married	Secondary	Employed	Cervical		1-2 years	Radiotherapy	3	3	0	0	2	3	3	0	1	0	1	0	0	0	1	1	3	0	0	0	0	1	1	5	1	3	5	5	5	1	5	5	5	Yes	Yes	Always	Very satisfied	Emotional support Financial support Information support Tangible assistance (e.g., transport, meals) Spiritual support	1
2025-10-21 00:57:45	2025-10-21 01:02:13	36	Male	Married		Employed	Others		More than 2 years	Radiotherapy	0	0	0	3	0	3		0	0	3	2	0		3	3		3	0	0	1	3	1	2	5	5	5	2	1	5	1	5	5	2	Yes	Yes	Always	Very satisfied	Emotional support Financial support Information support Spiritual support	1
2025-10-21 01:02:14	2025-10-21 01:05:33	56	Female	Married	Primary	Employed			More than 2 years	Surgery	0	0	0	0	0	0	3	0	0	0	0	0	0	0	0	0	0	0	0	0	0	1	1	2	3	1	5	5	5	1	5	5	5	Yes	Yes	Always	Dissatisfied	Emotional support Information support Tangible assistance (e.g., transport, meals) Spiritual support	1
2025-10-21 01:05:33	2025-10-21 01:09:23	31	Female	Single	Tertiary	Employed	Breast	Stage I	6-12 months	Chemotherapy	3	3	0	0	0	3	0	0	0			0	0	0	0	0	0	0	3	0	0	1	5	5	1	5	5	5	5	1	5	5	5	Yes	Yes	Always	Very satisfied	Emotional support Financial support Information support Tangible assistance (e.g., transport, meals) Spiritual support	1
2025-10-21 01:09:23	2025-10-21 01:14:00	42	Female	Married	Secondary	Employed	Others		6-12 months	Surgery	3	3	0	0	0	3	3	0	0	0	3	0	0	3	3	3	3	0	3	2	0	1	1	5	1	5	5	5	5	1	5	5	5	No	No	Always	Very satisfied	Emotional support Financial support Information support Tangible assistance (e.g., transport, meals) Spiritual support	1
2025-10-21 01:14:00	2025-10-21 01:19:06	54	Female	Married	Primary	Employed	Cervical		6-12 months	Radiotherapy	0	0	0	0	3	3	3	2	3	1	1	0	0	0	2	1	3	0	0	0	0	1	5	2	3	4	5	5	5	1	5	5	5	No	Yes	Always	Very satisfied	Emotional support Financial support Information support Tangible assistance (e.g., transport, meals) Spiritual support	1
2025-10-21 01:19:07	2025-10-21 09:01:36	29	Female	Single	Secondary	Employed	Breast		6-12 months	Chemotherapy	0	0	0	3	3	3	0	0	3	0	2	0	0	1	2	3	3	0	3	3	0	1	1	5	1	5	5	2	5	1	5	5	1	No	No	Always	Very satisfied	Financial support Information support Tangible assistance (e.g., transport, meals) Spiritual support	0
2025-10-21 09:01:36	2025-10-21 09:04:01	62	Male	Married	Tertiary	Retired	Others		More than 2 years	Surgery	0	0	0	0	0	0	0	0	0	0	0	0	0	0	0	0	0	0	3	3	0	5	5	3	5	5	5	5	5	1	5	5	5	Yes	Yes	Sometimes	Very satisfied	Emotional support Financial support Information support Tangible assistance (e.g., transport, meals) Spiritual support	1
2025-10-21 09:04:01	2025-10-21 09:07:40	48	Female	Married	Tertiary	Employed	Others		6-12 months	Chemotherapy	3	0	2	0		3	3	0	3	3	3	3	3	0	3	3	3	0	3	3	0	4	5	4	1	5	5	5	3	3	5	5	5	No	Yes	Always	Neutral	Emotional support Financial support Information support Tangible assistance (e.g., transport, meals) Spiritual support	1
2025-10-21 09:07:40	2025-10-21 09:10:05	65	Female	Married	Secondary	Retired	Breast		1-2 years	Chemotherapy	3	3	0	3	0	0	0	0	0	0	1	0	0	0	0	1	0	0	0	0	0	2	1	1	5	1	1	5	5	1	2	5	5	Yes	Yes	Always	Satisfied	Emotional support Financial support Information support Tangible assistance (e.g., transport, meals) Spiritual support	1
2025-10-21 09:10:05	2025-10-21 09:12:47	45	Female	Married	Tertiary	Employed	Breast	Stage II	More than 2 years	Radiotherapy	3	0	3	0	3	3	3	3	3	3	3	3	3	3	3	3	3	0	2	3	3	1	4	1	1	2	2	2	2	1	2	2	2	Yes	Yes	Rarely	Dissatisfied	Emotional support Financial support Information support Tangible assistance (e.g., transport, meals) Spiritual support	1
2025-10-21 09:12:47	2025-10-21 09:15:34	33	Male	Married	Secondary	Employed	Others		1-2 years	Chemotherapy	3	0	3	1	3	3	3	3	3	2	3	0	0	0	3	3	3	0	3	0	0	4	4	5	1	2	4	4	5	3	3	4	4	Yes	Yes	Sometimes	Neutral	Emotional support Financial support Information support Tangible assistance (e.g., transport, meals) Spiritual support	1
2025-10-21 09:15:34	2025-10-21 09:19:35	48	Female	Married	Tertiary	Employed	Breast	Stage II	1-2 years	Combination	3	3	0	0	3	3	0	0	3	3	3	3	3	0	3	3	3	0	3	3	3	4	4	1	4	4	5	4	5	4	1		4	Yes	Yes	Always	Neutral	Emotional support Financial support Information support Tangible assistance (e.g., transport, meals) Spiritual support	1
2025-10-21 09:19:35	2025-10-21 09:24:11	54	Female	Married	Secondary	Retired	Breast			Radiotherapy	0			0	0	0	0	0	0	0	1	0	0	0	1		1	0	1	1	0	4	4	1	4	4	4	4	4	4	4	5	4	Yes	Yes	Rarely	Very satisfied	Spiritual support	0
2025-10-21 09:24:12	2025-10-21 09:27:35		Female	Widowed	Tertiary	Employed	Others	Stage IV	More than 2 years	Immunotherapy	1	0	0	0	2	1	0	3	0	0	0	2	0	1	1	2	0	0	1	2	0	1	2	5	4	4	5	4	5		1	5	1	No	Yes	Always	Dissatisfied	Emotional support Financial support Information support Tangible assistance (e.g., transport, meals) Spiritual support	1
2025-10-21 09:27:35	2025-10-21 09:30:59	64	Male	Widowed	Secondary	Employed	Others		More than 2 years	Radiotherapy	3	3	0	3	3	3	3	3	3	3	3	3	3	3	3	3	3	0	3	3	3	2	3	1	1	1	1	1	1	1	1	1	1	Yes	Yes	Sometimes	Neutral	Emotional support Financial support	1
2025-10-21 09:30:59	2025-10-21 09:34:38		Female	Divorced	Tertiary	Employed	Breast	Stage II	1-2 years	Radiotherapy	0	1	1	0	1	2	0	1	2	0	0	0	0	0	1	0	1	3	1	1	0	2	2	5	4	2	2	3	5	5	3	4	3	I don't know	Yes	Always	Neutral	Financial support	0
2025-10-21 09:34:38	2025-10-21 09:37:29	38	Female	Married	Primary	Employed	Cervical		6-12 months	Surgery	3	0	0	0	3	3	3	3	3	3	3	3	3	3	0	0	3	0	0	3	0	4	4	4	3	4	4	1	4	1	5	1	1	Yes	Yes	Sometimes	Dissatisfied	Emotional support Financial support Information support	1
2025-10-21 09:37:29	2025-10-21 09:54:22	57	Male	Married	Secondary	Employed	Prostate	Stage I	More than 2 years	Combination	3	0	0	0	2	2	3	3		0	0	0	0	0	3	3	0	3	3	3	0	1	3	2	3	1	5	5	5	1	3	5	1	I don't know	No	Always	Neutral	Emotional support Financial support Information support Tangible assistance (e.g., transport, meals) Spiritual support	1
2025-10-21 09:54:22	2025-10-21 09:57:10	67	Male	Married	Tertiary	Employed	Prostate	Stage I	6-12 months	Radiotherapy	0	0	0	0	0	0	0	0	0	0	0	0	0	0	0	0	0	0	0	0	0	5	5	5	5	5	5	5	5	5	5	5	5	Yes	Yes	Always	Very dissatisfied	Emotional support Financial support Information support Tangible assistance (e.g., transport, meals) Spiritual support	1
2025-10-21 09:57:11	2025-10-21 10:01:09	70	Female	Married	Primary	Employed	Cervical		6-12 months		2	0	0	0	0	0	1	0	0	0	0	0	0	0	0	0	0	0	0	0	0	2	1	5	1	1	5	1	1	1	1	5	5	I don't know	No	Always	Dissatisfied	Emotional support	1
2025-10-21 10:01:10	2025-10-21 10:05:22	16	Female	Single	Secondary	Student	Others		Less than 6 months	Radiotherapy		3	0	3	3	3	3	1	1	3	3	3	1	2	2		0	2	1	0	2	2	1	5	3	3	4	1	2	2	3	2	4	Yes	Yes	Always	Satisfied	Emotional support Financial support Information support	1
2025-10-21 10:05:22	2025-10-21 10:12:23		Male	Single	Secondary	Student	Others	Stage O	Less than 6 months	Combination	0	0	3	3	0	3	3	3	3	0	3	3	0	3	3	3	3	0	3	3	0	1	4	1	1	1	5	4	2	1	2	5	3	No	Yes	Sometimes	Dissatisfied	Information support	0
2025-10-21 10:12:23	2025-10-21 10:15:48	56	Male	Married	Tertiary	Employed	Others		6-12 months	Chemotherapy	2	0	0	0	0	0	0	0	0	0	0	0	0	0	0	0	0	0	0	0	0	5	5	2	5	1	1	5	5		5	5	5	I don't know	No	Always	Very satisfied	Emotional support Information support	1
2025-10-21 10:15:48	2025-10-21 10:19:46	47	Female	Married	Secondary	Employed	Cervical	Stage IV	Less than 6 months	Chemotherapy	3	0	0	0	0	0	0	0	3	3	3	3	3	1	3	3	3	0	3	3	3	4	5	2	3	1	5	5	5	1	5	5	5	Yes	Yes	Always	Neutral	Emotional support Financial support Information support Tangible assistance (e.g., transport, meals) Spiritual support	1
2025-10-21 10:19:46	2025-10-21 10:25:39	63	Male	Married	Tertiary	Retired	Others		1-2 years	Chemotherapy	3	3	0	0	3	3	0		3	3	3	1	0	0	3	3	3	0	3	3	0	5	5	5	5	5	5	5	5	2	5	5	5	Yes	Yes	Always	Very satisfied	Emotional support Financial support Information support Tangible assistance (e.g., transport, meals) Spiritual support	1
2025-10-21 10:25:39	2025-10-21 10:30:12	55	Female	Married	Secondary	Employed	Prostate	Stage IV	6-12 months	Chemotherapy	3	0	3	0	0	2	0	0	3	0	3	0	0	0	3	1	3	0	0	0	0	4	5	3	4		5	5	5	1	5	5		Yes	Yes	Always	Very satisfied	Emotional support Financial support Information support Tangible assistance (e.g., transport, meals) Spiritual support	1
2025-10-21 10:30:12	2025-10-21 10:34:11	45	Female	Married	Tertiary	Employed	Others		More than 2 years	Surgery	0	0	0	0		3	0	0	3	2	3	2	3	0	3	3	3	0	2	2	0	4	5	5	1	4	5	5	5	5	5	5	5	I don't know	No	Always	Neutral	Information support	0
2025-10-21 10:34:11	2025-10-21 10:38:43	40	Female	Married	Secondary	Employed	Cervical	Stage II	6-12 months	Chemotherapy	3	0	0	0	1	0	3	0	0	0	0	0	0	0	0	0	0	0	0	0	0	1	2	5		1	1	5	1	1	1	5	5	I don't know	No	Always	Neutral	Information support	0
2025-10-21 10:38:43	2025-10-21 10:42:17	41	Female	Married	Secondary	Employed	Others		6-12 months	Surgery	3	0	0	0	0	1	0	0	0	0	2	0	0	0	3	3	1	0	2	2	0	3	2	1	2	1	5	3	3	1	5	1	2	Yes	Yes	Always	Neutral	Emotional support Financial support Tangible assistance (e.g., transport, meals) Spiritual support	1
2025-10-21 10:42:18	2025-10-21 10:44:16	36	Female	Single	Secondary	Employed	Others		Less than 6 months	Surgery	0	0	0	0	0	0	0	0	0	0	0	0	0	0	0	0	0	0	0	0	0	5	5	3	5	5	4	5	5	5	5	5	5	Yes	No	Sometimes	Very satisfied	Emotional support Financial support Information support Tangible assistance (e.g., transport, meals) Spiritual support	1
2025-10-21 10:44:17	2025-10-21 10:46:51	50	Female	Married	Primary	Employed	Others		Less than 6 months	Surgery	1	0	2	0	1	0	2	0	0	0	0	0	0	0	0	0	0	0	0	0	0	5	5	2	3	1	1	1	4	1	4	4	4	Yes	Yes	Always	Satisfied	Financial support Information support Tangible assistance (e.g., transport, meals)	0
2025-10-21 10:46:51	2025-10-21 10:48:57		Female	Married	Tertiary	Employed	Others		1-2 years	Surgery	0	0	0	0	0	0	0	0	0	0	0	0	0	0	0	0	0	0	0	0	0	4	4	4	4		4	4	4	4	4	4	4	Yes	Yes	Always	Satisfied	Emotional support Financial support Spiritual support	1
2025-10-21 10:48:57	2025-10-21 10:51:39	34	Female	Married	Secondary	Employed	Cervical		Less than 6 months	Chemotherapy	0	0	3	0	0	1	0	0	0	3	0	0	0	0	0	0	0	0	0	0	0	1	1	1	1	1	5	5	5	1	4	1	1	No	No	Always	Very satisfied	Emotional support Financial support Information support Tangible assistance (e.g., transport, meals) Spiritual support	1
2025-10-21 10:51:39	2025-10-21 10:54:03	62	Female	Married	Primary	Retired	Breast		More than 2 years	Radiotherapy	0	3	0	1	0	0	0	0	0	0	0	0	0	0	0	0	0	0	0	0	0	5	5	1	5	1	5	5	5	1	5		5	Yes	Yes	Always	Very satisfied	Emotional support Financial support Information support Tangible assistance (e.g., transport, meals)	1
2025-10-21 10:54:03	2025-10-21 10:56:56	45	Female	Divorced	Primary	Employed	Breast		6-12 months	Chemotherapy	3	0	3	0	0	0	0	0	0	0	0	0	0	0	0	0	2	0	0	0	0	1	5	3	4		5	5	4	3	5	5	5	Yes	Yes	Always	Dissatisfied	Emotional support Financial support Information support Tangible assistance (e.g., transport, meals)	1
2025-10-21 10:56:56	2025-10-21 11:01:00	71	Male	Married	Secondary	Retired	Prostate		1-2 years			0	0	0	0	0	3	0	0	0	0	0	0	0	0	0	0	0	0	0	0	1	5	1	2	1	5	5	5	1	5	5	5	I don't know	Yes	Always	Neutral	Emotional support Financial support Information support Tangible assistance (e.g., transport, meals)	1
2025-10-21 11:01:00	2025-10-21 11:03:27	48	Female	Married	Primary	Employed	Cervical		6-12 months		0	0	3	0	2	1	0	0	0	0	0	0	0	0	0	0	0	0	0	0	0	3	4	5	2	1	5	5	1	5	5	5	5	Yes	Yes	Always	Neutral	Emotional support Financial support Information support Tangible assistance (e.g., transport, meals) Spiritual support	1
2025-10-21 11:03:27	2025-10-21 11:07:41	46	Female	Married	Primary	Employed	Others		6-12 months		0	0	0	0	3	3	0	0	3	0	3	3	1	0	3	3	3	0	0		0	5	5	1	1	5	5	5	5	1	5	5	5	I don't know	Yes	Always	Very satisfied	Emotional support Financial support Information support Tangible assistance (e.g., transport, meals)	1
2025-10-21 11:07:41	2025-10-21 11:10:48	45	Female	Married	Tertiary	Employed	Others		Less than 6 months	Chemotherapy	0	0	3	0	0	2	3	0	0	0	0	0	0	0	0	0	2	0	0	0	0	1	5	2	1	2	5	5	5	1	5	5	5	Yes	Yes	Always	Neutral	Emotional support Financial support Information support Tangible assistance (e.g., transport, meals) Spiritual support	1
2025-10-21 11:10:48	2025-10-21 11:13:46	56	Female	Married	Secondary	Employed	Others		6-12 months	Chemotherapy	0	0	0	0	0	0	3	0	0	0	0	0	0	0	0	0	0	0	0	0	0	5	5	2	5	1	5	5	5	1	5	5	5	Yes	Yes	Always	Very satisfied	Emotional support Financial support Information support Tangible assistance (e.g., transport, meals)	1
2025-10-21 11:13:46	2025-10-21 11:28:38	40	Female	Married	Tertiary	Employed	Cervical	Stage II	6-12 months	Chemotherapy	0	0	0	0	0	2	3	0		0	0	3	0	0	0	0	0	0	3	0	0	1	5	5	3	1	5	5		1	5	5	5	Yes	Yes	Always	Very satisfied	Emotional support Financial support Information support Tangible assistance (e.g., transport, meals)	1
2025-10-21 11:28:38	2025-10-21 11:31:29	50	Female	Married	Secondary	Employed	Breast		Less than 6 months	Chemotherapy	3	0	0	0	2	3	3	1	0	0	0	2	0	0	1	0	3	0	0	0	0	5	5	5	4	1	5	5	5	1	5	5	5	Yes	Yes	Always	Very satisfied	Emotional support Financial support Information support Tangible assistance (e.g., transport, meals) Spiritual support	1
2025-10-21 11:31:29	2025-10-21 11:34:45	39	Female	Married	Secondary	Employed	Breast		More than 2 years	Chemotherapy	0	0	0	0	0	0	0	0	1	0	0	0	0	0	2	0	0	0	0	0	0	1	5	4	5	1	5	5	5	5	5	5	5	No	Yes	Always	Very satisfied	Emotional support Financial support Information support Tangible assistance (e.g., transport, meals) Spiritual support	1
2025-10-21 11:34:45	2025-10-21 11:38:00		Female	Married	Tertiary	Employed	Others	Stage II	Less than 6 months	Chemotherapy	3	3	0	0	2	1	0	0	0	0	0	3	0	0	1	0	1	0	0	0	0	2	5	5	3	2	5	5	5	1	5	5	5	No	Yes	Always	Very satisfied	Emotional support Financial support Tangible assistance (e.g., transport, meals) Spiritual support	1
2025-10-21 11:38:00	2025-10-21 11:41:55		Female	Married	Tertiary	Employed	Breast	Stage III	1-2 years	Surgery		1	0	0	0	0	0	0	0	0	0	0	0	0	0	0	0	0	1	0	0	3	4		4	1	5	5	5	3	2	4	3	No	No	Often	Neutral	Emotional support Financial support Information support Tangible assistance (e.g., transport, meals) Spiritual support	1
2025-10-21 11:41:55	2025-10-21 11:45:04	72	Male	Married	Primary	Employed	Others			Chemotherapy	0	0	0	0	0	0	3	0	0	0	0	0	0	0	0	0	0	3	0	0	0	2	5	2		1	5	5	5	1	5	5	5	I don't know	Yes	Always	Very satisfied	Emotional support Financial support Information support Tangible assistance (e.g., transport, meals)	1
2025-10-21 11:45:04	2025-10-21 11:48:34	67	Female	Married	Primary	Retired	Cervical	Stage III	More than 2 years		2	2	0	0	0	3	3	0	0	0	0	3	0	0	0	0	2	0	0	0	0	1	1	5	1	3	5	2	5	1	5	5	5	Yes	Yes	Always	Very satisfied	Emotional support Financial support Information support Tangible assistance (e.g., transport, meals) Spiritual support	1
2025-10-21 11:48:34	2025-10-21 11:51:07	25	Male	Single	Secondary	Employed	Others	Stage IV	1-2 years	Radiotherapy	0	1	0	0	0	0	0	1	0	0	0	3	0	0	0	0	0	0	0	0	0	5	5	1	5	1	5	5	5	5	5	5	5	Yes	Yes	Always	Very satisfied	Emotional support Financial support Information support Tangible assistance (e.g., transport, meals)	1
2025-10-21 11:51:07	2025-10-21 11:54:12	72	Male	Married	Primary	Unemployed	Prostate	Stage IV	1-2 years	Radiotherapy	1	3	0	0	0	0	3	0	0	0	0	0	0	0	1	0	0	0	0	0	0	4	2	4	5	1	5	5	5	1	5	5	5	Yes	Yes	Always	Very satisfied	Emotional support Financial support Information support Tangible assistance (e.g., transport, meals)	1
2025-10-21 11:54:12	2025-10-21 11:57:23	58	Male	Married	Tertiary	Employed	Others	Stage O	6-12 months	Chemotherapy	0	0	0	0	0	0	0	0	0	0	0	0	0	0	0	0	0	1	0	0	0	3	4	2	4	2	4	5	5	2	4	5	4	I don't know	No	Always	Satisfied	Information support	0
2025-10-21 11:57:23	2025-10-21 12:02:23	37	Female	Single	Tertiary	Unemployed	Breast	Stage III	More than 2 years	Chemotherapy	3	1	0	0	0	2	3	0	1	0	0	0	0	0	1	0	1	0	0	0	0	3	5	1	5	2	5	5	5	5	5	5	5	Yes	Yes	Always	Very satisfied	Emotional support Financial support Information support Tangible assistance (e.g., transport, meals) Spiritual support	1
2025-10-21 12:02:23	2025-10-21 19:23:39	72	Female	Widowed	Primary	Retired	Cervical		6-12 months	Chemotherapy	1	0	0	0	3	3	3	0	1	0	0	0	0	0	2	0	0	0	0	0	0	1	2	5	2	1	5	5	5	1	5	5	5	Yes	Yes	Always	Very satisfied	Emotional support Financial support Information support Tangible assistance (e.g., transport, meals) Others	1
2025-10-21 19:23:39	2025-10-21 19:25:53	54	Female	Married	Tertiary	Employed	Breast	Stage I	6-12 months	Chemotherapy	3	3	0	0	0	0	0	0	0	0	0	0	0	0	0	0	0	0	0	0	0	1	5	5	4	1	5	5	5	1	5	5	5	Yes	Yes	Always	Dissatisfied	Emotional support Financial support Information support Tangible assistance (e.g., transport, meals) Spiritual support	1
2025-10-21 19:25:54	2025-10-21 19:28:31	48	Female	Married	Secondary	Employed	Others		6-12 months	Chemotherapy	2	0	3	0	2	2	3	0	0	0	0	0	0	0	0	0	1	0	0	0	0	1	2	5	1	3	5	5	5	1	5	5	5	Yes	Yes	Always	Very satisfied	Emotional support Financial support Information support Tangible assistance (e.g., transport, meals) Spiritual support	1
2025-10-21 19:28:31	2025-10-21 19:31:42	44	Female	Married	Secondary	Employed	Breast		6-12 months	Chemotherapy	3	0	0	0	2	2	3	0	0	0	0	0	0	0	0	0	1	0	0	0	0	5	5	1	4	1	5	5	5	1	5	5	5	Yes	Yes	Always	Very satisfied	Emotional support Financial support Information support Tangible assistance (e.g., transport, meals) Spiritual support	1
2025-10-21 19:31:42	2025-10-21 21:22:47	45	Female	Married	Secondary	Employed	Cervical		1-2 years	Chemotherapy	0	0	0	0	0	0	0	0	0	0	0	0	0	0	0	0	0	0	0	0	0	3	5	1	5	1	5	5	5	1	5	5	5	No	No	Always	Very satisfied	Emotional support Financial support Information support Tangible assistance (e.g., transport, meals) Spiritual support	1
2025-10-21 21:22:47	2025-10-21 21:26:03	65	Female	Married	Secondary	Employed	Breast		6-12 months	Chemotherapy	3	2	0	0	0	3	2	0	0	0	0	0	0	0	0	0	2	0	0	0	0	1	2	3	1	2	5	5	5	1	5	5	5	No	No	Always	Dissatisfied	Emotional support Financial support Information support Tangible assistance (e.g., transport, meals) Spiritual support	1
2025-10-21 21:26:03	2025-10-21 21:29:06	65	Female	Married	Secondary	Employed	Others	Stage IV	Less than 6 months	Chemotherapy	3	0	0	0	0	0	0	0	1	0	0	0	0	0	0	0	1	0	0	0	0	3	2	5	4	2	1	5	5	1	5	5	5	No	Yes	Always	Very satisfied	Emotional support Financial support Information support Tangible assistance (e.g., transport, meals) Spiritual support	1
2025-10-21 21:29:06	2025-10-21 21:33:03	39	Female	Married	Secondary	Employed	Cervical		Less than 6 months	Chemotherapy	0	0	0	0	3	0	0	0	1	0	0	0	0	0	1	0	2	0	0	0	0	1	1	5	1	2	5	5	5	1	5	5	5	Yes	Yes	Always	Very satisfied	Emotional support Financial support Information support Spiritual support	1
2025-10-21 21:33:03	2025-10-21 21:37:30	36	Female	Married	Tertiary	Employed	Cervical		Less than 6 months	Chemotherapy	1	0	0	0	0	3	3	0	1	0	0	0	0	0	2	0	2	0	0	0	0	3	5	2	4	1	5	5	5	1	5	5	5	I don't know	Yes	Always	Dissatisfied	Emotional support Financial support Information support Tangible assistance (e.g., transport, meals) Spiritual support	1
2025-10-21 21:37:30	2025-10-21 21:41:35	43	Male	Married	Secondary	Employed	Others		6-12 months	Radiotherapy	0	3	0	0	0	3	3	0	3	3	1	0	0	0	3	0	3	0	1	1	0	1	1	5	1	3	2	5	5	1	5	5	5	No	No	Always	Dissatisfied	Emotional support Financial support Information support Tangible assistance (e.g., transport, meals) Spiritual support	1
2025-10-21 21:41:36	2025-10-22 10:08:58	80	Male	Married	Primary	Employed	Others		6-12 months	Combination	3	3	0	0	0	3	3	0	0	0	0	0	0	0	0	0	0	0	0	0	0	1	1	5	1	1	5	5	5	1	5	5	5	I don't know	Yes	Always	Satisfied	Emotional support Financial support Information support Tangible assistance (e.g., transport, meals) Spiritual support	1
2025-10-22 10:08:58	2025-10-22 10:13:01	57	Male	Married	Secondary	Employed	Others		1-2 years	Chemotherapy	0	0	0	0	0	0	3	0	0	0	0	0	0	0	0	0	0	0	2	0	0	1	1	2	1	1	5	5	5	1	5	5	5	Yes	Yes	Always	Very satisfied	Emotional support Financial support Information support Tangible assistance (e.g., transport, meals) Spiritual support	1
2025-10-22 10:13:02	2025-10-22 10:15:45	38	Male	Married	Secondary	Employed	Others		1-2 years	Chemotherapy	3	3	0	0	3	3	3	0	2	0	0	0	0	0	2	0	3	0	3	0	0	1	1	5	1	3	5	5	5	5	5	5	1	I don't know	No	Always	Dissatisfied	Emotional support Financial support Information support Tangible assistance (e.g., transport, meals) Spiritual support	1
2025-10-22 10:15:45	2025-10-22 10:18:45	20	Male	Single	Secondary	Unemployed	Others		6-12 months	Combination	0	0	0	0	0	0	3	0	0	0	0	0	0	0	0	0	0	0	0	0	0	1	2	5	1	1	5	5	5	1	5	5	5	No	Yes	Always	Neutral	Emotional support Financial support Information support Tangible assistance (e.g., transport, meals) Spiritual support	1
2025-10-22 10:18:45	2025-10-22 10:21:46	21	Female	Single	Secondary	Employed	Others		Less than 6 months	Surgery	0	0	0	0	3	0	3	0	0	0	0	0	0	0	3	2	0	0	0	0	0	5	5	1	4	2	5	5	5	5	5	5	5	No	Yes	Always	Neutral	Emotional support Financial support Information support Tangible assistance (e.g., transport, meals) Spiritual support	1
2025-10-22 10:21:46	2025-10-22 10:27:47	34	Female	Married	Tertiary	Employed	Breast		6-12 months	Surgery	0	0	0	0	0	0	3	0	0	0	0	0	0	0	0	0	2	0	0	0	0	1	1	5	1	1	5	5	5	1	5	5	5	I don't know	Yes	Always	Dissatisfied	Emotional support Financial support Information support Tangible assistance (e.g., transport, meals) Spiritual support	1
2025-10-22 10:27:47	2025-10-22 10:30:48	37	Female	Married	Secondary	Employed	Others		6-12 months	Surgery	0	0	0	0	1	3	3	0	0	0	0	3	0	0	0	0	3	0	0	0	0	1	1	5	1	3	5	5	5	1	5	5	5	Yes	Yes	Always	Satisfied	Emotional support Financial support Information support Tangible assistance (e.g., transport, meals) Spiritual support	1
2025-10-22 10:30:48	2025-10-22 10:40:45	56	Female	Married	Tertiary	Employed	Others		Less than 6 months	Surgery	3	0	0	0	1	3	3	0	0	0	1	3	0	0	0	0	0	0	0	0	0	1	1	5	1	1		5	5	1	5	5	5	I don't know	Yes	Always	Dissatisfied	Emotional support Financial support Information support Tangible assistance (e.g., transport, meals) Spiritual support	1
2025-10-22 10:40:45	2025-10-22 10:44:16	60	Female	Married		Employed	Breast		6-12 months	Combination	3	0	0	0	3	3	0	3	3	0	3	3	0	0	3	2	2	0	0	0	0	1	5	5	2	5	5	5	5	1	5	5	5	I don't know	Yes	Always	Neutral	Emotional support Financial support Information support Tangible assistance (e.g., transport, meals) Spiritual support	1
2025-10-22 10:44:16	2025-10-22 10:48:18	56	Female	Married	Tertiary	Employed	Cervical		6-12 months	Radiotherapy	2	0	0	0	2	2	0	0	0	0	0	0	0	0	2	0	0	0	0	0	0	5	5	1	5	2	5	5	5	1	5	5	5	Yes	Yes	Always	Very satisfied	Emotional support Financial support Information support Tangible assistance (e.g., transport, meals) Spiritual support	1
2025-10-22 10:48:18	2025-10-22 10:51:36	68	Female	Married	Tertiary	Retired	Others		6-12 months	Surgery	0	2	0	0	3	3	2	2	0	0	0	0	0	0	2	0	2	0	0	0	0	5	5	5	5	1	5	5	5	1	5	5	5	I don't know	Yes	Always	Neutral	Emotional support Financial support Information support Tangible assistance (e.g., transport, meals) Spiritual support	1
2025-10-22 10:51:36	2025-10-22 10:56:17	27	Male	Single	Secondary	Employed	Others		6-12 months	Chemotherapy	3	3	0	2	2	3	3	0	0	0	0	0	0	3	2		3	0		0	0	1		5	1	1	5	5	5	1	5	5	5	Yes	Yes	Always	Very dissatisfied	Emotional support Financial support Information support Tangible assistance (e.g., transport, meals) Spiritual support	1
2025-10-22 10:56:18	2025-10-22 11:00:13		Female	Married	Secondary	Retired	Others		6-12 months	Chemotherapy	3	0	0	0	3	3	3	0	1	0	0	2	0	0	2	0	2	0	0	0	0	1	1	5	1	1	5	5	5	1	5	5	5	Yes	Yes	Always	Very satisfied	Emotional support Financial support Information support Tangible assistance (e.g., transport, meals) Spiritual support	1
2025-10-22 11:00:13	2025-10-22 11:25:39	58	Female	Married	Secondary	Employed	Others		More than 2 years		3	0	0	0	0	3	0	0	0	0	0	0	0	0	0	0	0	0	0	0	0	1	5	1	1	1	5	5	5	1	5	5	5	I don't know	Yes	Always	Neutral	Emotional support Financial support Information support Tangible assistance (e.g., transport, meals)	1
2025-10-22 11:25:39	2025-10-22 11:29:36	38	Female	Married	Tertiary	Employed	Breast	Stage III	6-12 months	Chemotherapy	0	0	0	0	2	3	0	0	2		0	0	0	0	0	0	2	0	0	0	0	1	5	4	2	2	5	5	5	1	5	5	5	Yes	Yes	Always	Very satisfied	Emotional support Financial support Information support Tangible assistance (e.g., transport, meals) Spiritual support	1
2025-10-22 11:29:37	2025-10-22 11:34:36	46	Female	Married	Primary	Employed	Breast	Stage I	Less than 6 months	Chemotherapy	2	0	3	0	3	3	3	0	1	0	2	0	0	0	2	2	2	0	0	0	0	1	4	5	1	1	5	5	5	1	5	5	5	I don't know	Yes	Always	Neutral	Emotional support Financial support Information support Tangible assistance (e.g., transport, meals) Spiritual support	1
2025-10-22 11:34:36	2025-10-22 12:50:10	59	Male	Married	Primary	Employed	Others		6-12 months	Surgery	0	0	0	2	0	3	3	0	0	0	0	0	0	0	0	2	2	0	2	2	0	1	5	1	1	1	5	5	5	1	5	5	5	Yes	Yes	Always	Dissatisfied	Emotional support Financial support Information support Tangible assistance (e.g., transport, meals) Spiritual support	1
2025-10-22 12:50:10	2025-10-22 12:53:08	63	Male	Married	Tertiary	Employed	Prostate	Stage III	6-12 months	Radiotherapy	3	3	0	0	0	3	3	0	0	0	0	0	0	0	0	0	2	0	0	0	0	5	5	5	1	1	5	5	5	1	5	5	5	I don't know	No	Always	Dissatisfied	Emotional support Financial support Information support Tangible assistance (e.g., transport, meals) Spiritual support	1
2025-10-22 12:53:08	2025-10-22 12:55:39	19	Male	Single	Secondary	Student	Others		6-12 months	Surgery	2	0	0	0	0	3	3	0	0	0	0	0	0	0	2	0	2	0	0	0	0	4	5	1	3	2	5	5	5	1	5	5	5	No	Yes	Always	Neutral	Emotional support Financial support Information support Tangible assistance (e.g., transport, meals)	1
2025-10-22 12:55:39	2025-10-22 12:59:08	63	Female	Married	Tertiary	Retired	Others		6-12 months	Surgery	2	0	3	0	0	3	3	0	0	0	0	0	0	0	1	0	2	0	0	0	0	1	2	5	1	1	5	5	5	1	5	5	5	I don't know	Yes	Always	Neutral	Emotional support Financial support Information support Tangible assistance (e.g., transport, meals) Spiritual support	1
2025-10-22 12:59:09	2025-10-22 13:01:38	50	Female	Married	Tertiary		Breast	Stage I	6-12 months	Radiotherapy	0	0	0	0	0	0	0	0	0	0	0	0	0	0	0	0	0	0	0	0	0	4	5	1	5	1	5	5	5	5	5	5	5	Yes	Yes	Always	Neutral	Emotional support Financial support Information support Tangible assistance (e.g., transport, meals) Spiritual support	1
2025-10-22 13:01:38	2025-10-22 13:04:12	35	Female	Married	Secondary	Employed	Breast		More than 2 years	Radiotherapy	0	0	0	0	0	0	0	0	0	0	0	0	0	0	0	0	0	0	0	0	0	1	5	2	2	1	5	5	5	1	5	5	5	No	Yes	Always	Very dissatisfied	Emotional support Financial support Information support Tangible assistance (e.g., transport, meals) Spiritual support	1
2025-10-22 13:04:12	2025-10-22 13:08:58	75	Female	Married	Primary	Retired	Cervical		6-12 months	Radiotherapy	2	0	0	0	3	2	3	3	2	0	1	3	0	0	2	1	1	0	0	0	0	1	1	5	1	1	1	5	5	1	5	5	5	I don't know	No	Always	Neutral	Emotional support Financial support Information support Tangible assistance (e.g., transport, meals)	1
2025-10-22 13:08:58	2025-10-22 13:12:06	43	Male	Married	Tertiary	Employed	Others	Stage IV	1-2 years	Radiotherapy	3	0	0	0	2	3	3	0	2	0	2	3	0	0	2	1	2	0	3	0	0	1	3	5	1	3	5	1	5	1	5	5	5	No	Yes	Always	Neutral	Emotional support Financial support Information support Tangible assistance (e.g., transport, meals) Others	1
2025-10-22 13:12:06	2025-10-22 15:26:23	40	Female	Married	Primary	Employed	Others		More than 2 years	Chemotherapy		3	0	0	0	3	3	0	0	2	0		0	3	0	1	3	0	0	0	0	1	2	5	1	1	3	3	1	1	5	5	5	No	Yes	Sometimes	Dissatisfied	Emotional support Financial support Information support Tangible assistance (e.g., transport, meals) Spiritual support	1
2025-10-22 15:26:24	2025-10-22 15:28:32	56	Female	Married	Tertiary	Employed	Cervical		More than 2 years	Radiotherapy	0	0	0	0	2	0	0	0	0	0	0	2	0	0	0	0	2	0	0	0	0	4	5	1	5	1	5	5	5	1	5	5	5	Yes	Yes	Always	Very satisfied	Emotional support Financial support Information support Tangible assistance (e.g., transport, meals) Spiritual support	1
2025-10-22 15:28:32	2025-10-22 15:30:39	67	Female	Married	Primary	Employed	Cervical	Stage II	Less than 6 months	Chemotherapy	0	0	0	0	0	2	1	0	0	0	0	2	0	0	0	0	2	0	0	0	0	1	1	2	1	1	5	5	5	1	5	5	5	Yes	Yes	Always	Very satisfied	Emotional support Financial support Information support Tangible assistance (e.g., transport, meals) Spiritual support	1
2025-10-22 15:30:39	2025-10-22 15:32:38	52	Male	Married	Primary	Employed	Others		6-12 months	Chemotherapy	0	0	0	0	0	3	3	0	0	0	0	0	0	0	0	0	1	0	3	0	0	1	1	5	1	3	5	5	5	1	5	5	5	No	No	Always	Satisfied	Emotional support Financial support Information support Tangible assistance (e.g., transport, meals) Spiritual support	1
2025-10-22 15:32:38	2025-10-22 15:35:58	34	Female	Married	Tertiary	Employed	Breast	Stage III	6-12 months	Chemotherapy	0	0	0	0	0	0	1	0	0	0	0	3	0	0	2	0	2	0	3	0	0	1	2	2	1	1	5	5	5	1	5	5	5	Yes	Yes	Always	Very satisfied	Emotional support Financial support Information support Tangible assistance (e.g., transport, meals) Spiritual support	1
2025-10-22 15:35:58	2025-10-22 15:38:27	52	Female	Single	Tertiary	Employed	Breast		More than 2 years	Chemotherapy	3	0	0	0	0	0	3	0	0	0	0	1	0	0	0	0	1	0	3	0	0	1	1	5	5	1	5	5	5	1	5	5	5	Yes	Yes	Sometimes	Neutral	Emotional support Financial support Information support Tangible assistance (e.g., transport, meals) Spiritual support	1
2025-10-22 15:38:27	2025-10-22 15:44:47	72	Female	Married	Secondary	Employed	Cervical	Stage I	Less than 6 months	Radiotherapy	0	0	0	0	0	0	0	0	3	0	0	0	0	0	1	0	0	0	0	0	0	5	5	1	5	1	5	5	5	1	1	1	1	Yes	Yes	Always	Very satisfied	Emotional support Financial support Information support Tangible assistance (e.g., transport, meals) Spiritual support	1
2025-10-22 15:44:47	2025-10-22 15:47:12	23	Male	Single	Secondary	Unemployed	Others		1-2 years	Surgery	0	1	0	0	0	2	3	0	0	0	0	1	0	0	0	0	1	0	3	0	0	1	1	4	3	1	5	1	5	1	5	5	5	No	Yes	Always	Very satisfied	Emotional support Financial support Information support Tangible assistance (e.g., transport, meals) Spiritual support	1
2025-10-22 15:47:13	2025-10-22 15:49:16	67	Male	Married	Primary	Retired	Prostate		More than 2 years	Surgery	0	0	0	0	0	3	3	0	0	0	0	0	0	0	0	0	0	2	3	0	0	1	5	5	5	1	5	5	5	1	5	5	5	Yes	Yes	Always	Satisfied	Emotional support Financial support Information support Tangible assistance (e.g., transport, meals) Spiritual support	1
2025-10-22 15:49:16	2025-10-22 15:51:29	32	Female	Married	Secondary	Employed	Cervical		More than 2 years	Radiotherapy	0	3	0	0	0	0	3	0	0	0	0	0	0	0	0	0	0	0	0	0	0	1	1	4	1	1	5	5	1	1	5	5	5	No	Yes	Sometimes	Very satisfied	Emotional support Financial support Tangible assistance (e.g., transport, meals) Spiritual support	1
2025-10-22 15:51:29	2025-10-22 16:00:34	72	Female	Married	Primary	Employed	Others		6-12 months	Surgery	3	0	0	0	0	0	3	0	0	0	0	0	0	0	0	0	0	0	0	0	0	1	5	5	1	1	5	5	5	1	5	5	5	I don't know	Yes	Always	Neutral	Emotional support Financial support Information support Tangible assistance (e.g., transport, meals) Spiritual support	1
2025-10-22 16:00:35	2025-10-22 16:03:17	45	Female	Married	Secondary	Employed	Breast		6-12 months	Chemotherapy	0	0	0	0	0	0	3	0	0	0	0	0	0	0	0	0	0	0	0	0	0	1	1	2	1	1	5	5	5	1	5	5	5	Yes	Yes	Always	Very satisfied	Emotional support Financial support Information support Tangible assistance (e.g., transport, meals) Spiritual support	1
2025-10-22 16:03:18	2025-10-22 16:05:44	46	Female	Married	Tertiary	Employed	Others		Less than 6 months	Surgery	0	0	0	0	0	2	3	0	0	0	0	1	0	0	0	0	0	0	0	0	0	1	1	5	5	1	5	5	5	1	5	5	5	Yes	Yes	Always	Neutral	Emotional support Financial support Information support Tangible assistance (e.g., transport, meals) Spiritual support	1
2025-10-22 16:05:44	2025-10-22 16:17:02	60	Female	Married	Tertiary	Employed	Others		6-12 months	Surgery	0	0	0	0	3	3	3	0	0	0	0	0	0	0	2	0	2	0	0	0	0	1	1	1	1	1	5	5	5	1	5	5	5	No	Yes	Always	Neutral	Emotional support Financial support Information support Tangible assistance (e.g., transport, meals)	1
2025-10-22 16:17:02	2025-10-22 16:20:06	44	Female	Married	Tertiary	Employed	Breast	Stage I	1-2 years	Radiotherapy	0	3		0	0	2	3	0	0	0	0	2	0	0	0	0	0	0	0	0	0	1	1	5	1	1	5	4	5	1	5	5	5	Yes	Yes	Always	Very satisfied	Emotional support Financial support Information support Tangible assistance (e.g., transport, meals) Spiritual support	1
2025-10-22 16:20:07	2025-10-22 16:21:40	53	Female	Married	Secondary	Employed	Breast		Less than 6 months	Chemotherapy	3	0	0	0	0	0	0	0	0	0	0	0	0	0	0	0	0	0	0	0		1	5	2	4	1	5	5	5	5	5	5	5	Yes	Yes	Always	Very satisfied	Emotional support Financial support Information support Tangible assistance (e.g., transport, meals) Spiritual support	1
2025-10-22 16:21:40	2025-10-22 16:25:03	43	Female	Married	Tertiary	Employed	Breast		Less than 6 months	Chemotherapy	2	3	0	0	3	3		0	2	0	0	1	0	0	0	0	0	0	0	0	0	4	5	2	5	1	5	5	5	5	5	5	5	No	No	Always	Very satisfied	Emotional support Financial support Information support Tangible assistance (e.g., transport, meals) Spiritual support	1
2025-10-22 16:25:04	2025-10-22 16:27:11	22	Male	Single	Tertiary	Student	Others		Less than 6 months	Combination	3	0	0	0	0	3	0	0	0	0	0	0	0	0	0	0	0	0	0	0	0	5	5	5	5	1	5	5	5	1	5	5	5	Yes	Yes	Always	Neutral	Emotional support Financial support Information support Tangible assistance (e.g., transport, meals)	1
2025-10-22 16:27:11	2025-10-22 16:29:49	63	Male	Married	Tertiary	Retired	Others	Stage I	Less than 6 months	Surgery	3	0	0	0	0	3	0	0	0	0	0	0	0	0	0	0	0	0		3	0	1	4	4	3	1	5	5	5	1	5	5	5	I don't know	No	Always	Neutral	Emotional support Financial support Information support Tangible assistance (e.g., transport, meals) Spiritual support	1
2025-10-22 16:29:49	2025-10-22 16:32:09	65	Female	Married	Secondary	Retired	Others		6-12 months	Surgery	0	0	0	0	2	0	3	0	0	0	0	0	0	0	2	0	0	0	0	0	0	1	4	5	3	1	5	5	5	1	5	5	5	Yes	Yes	Always	Very satisfied	Emotional support Financial support Information support Tangible assistance (e.g., transport, meals) Spiritual support	1
2025-10-22 21:03:15	2025-10-22 21:05:39	38	Male	Married	Primary	Employed	Breast		6-12 months	Surgery	0	0	0	0	0	0	0	0	0	0	0	0	0	0	0	0	0	0	0	0	0	5	5	5	5	1	5	5	1	5	5	5	5		Yes	Rarely	Very satisfied	Emotional support Financial support Information support Tangible assistance (e.g., transport, meals) Spiritual support	1
2025-10-22 21:05:39	2025-10-22 21:07:34	50	Female	Married	Tertiary	Employed	Breast	Stage O	6-12 months	Surgery	0	0	0	0	0	0	0	0	0	0	0	0	0	0	0	0	0	0	0	0	0	1	5	2	5	1	5	5	5	5	5	5	5	Yes	Yes	Always	Neutral	Emotional support Financial support Information support Tangible assistance (e.g., transport, meals) Spiritual support	1
2025-10-22 21:07:34	2025-10-22 21:11:04	48	Female	Married	Tertiary	Employed	Others		More than 2 years	Surgery	0	0	0	2	0	2	3	0	0	0	0	3	0	0	0	0	2	0	0	0	0	1	5	1	2	1	5	5	5	5	5	5	5	No	Yes	Always	Neutral	Emotional support Financial support Information support Tangible assistance (e.g., transport, meals) Spiritual support	1
2025-10-22 21:11:04	2025-10-22 21:13:11	45	Female	Married	Primary	Employed	Others		6-12 months	Surgery	3	2	0	0	0	3	3	0	0	0	0	0	0	0	0	0	2	0	0	0	0	1	1	5	1	1	5	5	5	1	5	5	5	Yes	Yes	Always	Neutral	Emotional support Financial support Information support Tangible assistance (e.g., transport, meals) Spiritual support	1
2025-10-22 21:13:11	2025-10-22 21:16:11	40	Female	Married	Tertiary	Employed	Breast		More than 2 years	Chemotherapy	0	0	0	0	3	3	2	0	3	0	3	0	0	0	3	0	3	0	0	0	0	5	4	2	4	3	5	5	5	1	5	5	5	Yes	Yes	Always	Very satisfied	Emotional support Financial support Information support Tangible assistance (e.g., transport, meals) Spiritual support	1
2025-10-22 21:16:11	2025-10-22 21:18:06	65	Male	Married	Tertiary	Retired	Others		6-12 months		0	0	0	0	0	0	0	0	0	0	0	0	0	0	0	0	0	0	0	0	0	5	5	5	4	1	5	5	5	5	5	5	5	Yes	Yes	Always	Very satisfied	Emotional support Financial support Information support Tangible assistance (e.g., transport, meals) Spiritual support	1
2025-10-22 21:18:07	2025-10-22 21:20:23	58	Female	Married	Tertiary		Others	Stage O	6-12 months		1	0	0	0	0	0	0	0	0	0	0	0	0	0	0	0	0	0	0	0	0	2	5	3	4	1	5	5	4		5	5	5	No	No	Always	Very satisfied	Emotional support Financial support Information support Tangible assistance (e.g., transport, meals) Spiritual support	1
2025-10-22 21:20:23	2025-10-22 21:23:20	50	Female	Married	Secondary	Employed	Breast			Chemotherapy	3	3	0	0	0	3	3	0	3	0	1	3	0	3	2	1	2	0	3	0	0	1	1	4	1	1	5	5	5	1	5	5	5	Yes	Yes	Always	Very satisfied	Emotional support Financial support Information support Tangible assistance (e.g., transport, meals) Spiritual support	1
2025-10-22 21:23:21	2025-10-22 21:27:00	65	Female	Married	Primary	Employed	Breast		6-12 months	Chemotherapy	0	0	0	0	0	3	3	0	0	0	0	0	0	0	0	0	2	0	0	0	0	4	1	5	3	1	5	5	5	1	5	5	5	Yes	Yes	Always	Very satisfied	Emotional support Financial support Information support Tangible assistance (e.g., transport, meals) Spiritual support	1
2025-10-22 21:27:00	2025-10-22 21:29:43	53	Female	Married	Primary	Employed	Breast		More than 2 years	Chemotherapy	3	0	3	0	0	3	3	0	0	0	0	0	0	0	0	0	0	0	0	0	0	5	3	2	3	2	5	5	5	1	5	5	5	Yes	Yes	Always	Very satisfied	Emotional support Financial support Information support Tangible assistance (e.g., transport, meals) Spiritual support	1
2025-10-22 21:29:43	2025-10-22 21:32:34	31	Male	Single	Tertiary	Employed	Others		6-12 months	Chemotherapy	0	0	0	0	1	0	3	0	0	0	0	0	0	0	0	0	0	0	0	0	0	4	5	1	3	2	5	5	4	1	5		5	I don't know	Yes	Sometimes	Dissatisfied	Emotional support Financial support Information support Tangible assistance (e.g., transport, meals) Spiritual support	1
2025-10-22 21:32:34	2025-10-22 21:34:41	50	Female	Married	Primary	Employed	Others		6-12 months		2	0	0	0	0	0	0	0	0	0	0	0	0	0	0	0	0	0	0	0	0	5	5	2	4	1	5	5	3	5	5	5	5	Yes	Yes	Sometimes	Very satisfied	Emotional support Financial support Information support Tangible assistance (e.g., transport, meals) Spiritual support	1
2025-10-22 21:34:42	2025-10-22 21:37:49	40	Male	Married	Secondary	Employed	Others		6-12 months	Surgery	0	0	0	0	2		2	0	0	0	0	0	0	0	0	0	2	0	0	0	0	5	5	3	4	1	5	5	5	5	5	5	5	No	No	Sometimes	Satisfied	Emotional support Financial support Information support Tangible assistance (e.g., transport, meals) Spiritual support	1
2025-10-22 21:37:49	2025-10-22 21:39:57	47	Male	Married	Secondary	Employed	Others		1-2 years	Surgery	1	3	0	0	2	3	3	0	0	0	0	0	0	1	0	0	2	0	0	2	0	1	1	5	4	1	5	5	5	1	5	5	5	Yes	Yes	Sometimes	Satisfied	Emotional support Financial support Information support Tangible assistance (e.g., transport, meals) Spiritual support	1
2025-10-22 21:39:57	2025-10-22 21:42:27	67	Female	Married	Primary	Retired	Others		Less than 6 months	Chemotherapy	0	1	0	0	1	0	3	0	0	0	0	0	0	0	0	0	0	0	0	0	0	5	5	5	3	1	5	5	5	1	5	5	5	Yes	Yes	Always	Very satisfied	Emotional support Financial support Information support Tangible assistance (e.g., transport, meals) Spiritual support	1
2025-10-22 21:42:27	2025-10-22 21:45:33	55		Married	Secondary	Employed	Breast		Less than 6 months	Surgery	0	0	0	0	3	2	3	0	2	0	2	1	0	0	2	0	2	0	0	0	0	1	1	5	1	1	5	5	5	1	5	5	5	I don't know	Yes	Always	Very satisfied	Emotional support Financial support Information support Tangible assistance (e.g., transport, meals) Spiritual support	1
2025-10-22 21:45:34	2025-10-22 21:49:31	46	Female	Married	Secondary	Employed	Breast		1-2 years	Chemotherapy	0	3	0	0	3	3																				5	5	5	5	1	5	5	5	Yes	Yes	Always	Very satisfied	Emotional support Financial support Information support Tangible assistance (e.g., transport, meals) Spiritual support	1
2025-10-22 21:49:31	2025-10-22 21:52:18	37	Female	Married	Tertiary	Employed	Breast		6-12 months	Chemotherapy	3	1	0	0	3	3	3	0	3	0	3	3	0	0	3	0	3	0	3	3	3	5	5	1	5	4	5	5	5	1	5	5	5	Yes	Yes	Always	Very satisfied	Emotional support Financial support Information support Tangible assistance (e.g., transport, meals) Spiritual support	1
2025-10-22 21:52:18	2025-10-22 21:55:17	41	Female	Married	Tertiary	Employed	Breast		Less than 6 months	Chemotherapy	3	0	0	0	3	3	2	0	0	0	2	0	0	0	2	0	2	0	0	0	0	1	2	5	3	2	5	5	5	1	5	5	5	Yes	Yes	Always	Very satisfied	Emotional support Financial support Information support Tangible assistance (e.g., transport, meals) Spiritual support	1
2025-10-22 21:55:17	2025-10-22 21:58:44	39	Female	Single	Tertiary	Employed	Others		Less than 6 months		0	0	0	0	0	2	0	0	0	0	2	3	0	0	2	0	1	0	0	0	0	1	5	1	5	2	5	5	5	1	5	5	5	I don't know	Yes	Always	Very satisfied	Emotional support Financial support Information support Tangible assistance (e.g., transport, meals) Spiritual support	1
2025-10-22 21:58:44	2025-10-22 22:01:20	55	Male	Married	Tertiary	Employed	Others		6-12 months	Chemotherapy	1	0	0	0	2	1	0	1	0	0	0	2	0	0	1	0	0	0	0	0	0	1	5	2	4	2	5	5	5	5	5	5	5	No	No	Always	Satisfied	Emotional support Financial support Information support Tangible assistance (e.g., transport, meals) Spiritual support	1
2025-10-22 22:01:20	2025-10-22 22:05:30	29	Female	Married	Tertiary	Employed	Breast		6-12 months	Chemotherapy	0	0	0	0	0	3	0	0	1	0	0	0	0	0	0	0	0	0	0	0	0	5	5	5	5	1	5	5	5	5	5	5	5	Yes	Yes	Always	Very satisfied	Emotional support Financial support Information support Tangible assistance (e.g., transport, meals) Spiritual support	1
2025-10-22 22:05:30	2025-10-22 22:10:05	40	Female	Married	Primary	Employed	Others		1-2 years	Chemotherapy	3	0	0	3	3	3	0	0	0	0	0	0	0	3	0	0	0	0	0	0	0		1	5	1	1	5	5	5	1	5	5	5	Yes	Yes	Always	Very satisfied	Emotional support Financial support Information support Tangible assistance (e.g., transport, meals) Spiritual support	1
2025-10-22 22:10:05	2025-10-22 22:12:38	64	Male	Married	Tertiary	Employed	Others	Stage I	Less than 6 months	Chemotherapy	0	0	0	0	0	0	3	0	0	0	0	3	0	0	0	0	0	0	0	0	0	1	1	2	4	1	5	5	5	1	5	5	5	No	Yes	Always	Satisfied	Emotional support Financial support Information support Tangible assistance (e.g., transport, meals) Spiritual support	1
2025-10-22 22:12:38	2025-10-22 22:16:01		Female	Married	Secondary	Employed	Others		Less than 6 months	Chemotherapy	3	0	0	0	3	0	0	0	0	0	0	0	0	0	0	0	0	0	0	0	0	5	5	1	5	1	5	5	5	1	5	5	5	Yes	Yes	Always	Very satisfied	Emotional support Financial support Information support Tangible assistance (e.g., transport, meals) Spiritual support	1
2025-10-22 22:16:01	2025-10-22 22:18:42	54	Female	Married	Secondary	Employed	Breast		6-12 months	Chemotherapy	0	0	0	0	0	0	0	0	0	0	0	0	0	0	0	0	0	0	0	0	0	3	5	1	5	1	5	5	5	5	5	5	5	I don't know	No	Always	Satisfied	Emotional support Financial support Information support Tangible assistance (e.g., transport, meals)	1
2025-10-22 22:18:43	2025-10-22 22:21:15	35	Female	Married	Secondary	Employed	Breast		6-12 months	Chemotherapy	0	2	0	0	0	3	2	0	3	3	3	3	0	3	3	2	3	0	3	0	0	4	5	5	5	4	5	5	5	5	5	5	5		Yes	Sometimes	Very satisfied	Emotional support Financial support Information support Tangible assistance (e.g., transport, meals) Spiritual support	1
2025-10-22 22:21:16	2025-10-22 22:24:45	49	Female	Widowed	Primary	Employed	Others		6-12 months	Chemotherapy	2	0	0	0	0	3	3	0	0	0	0	0	0	0	0	0	2	0	0	3	0	4	2	4	2	1	5	5	5	1	5	5	5	No	No	Always	Very satisfied	Emotional support Financial support Information support Tangible assistance (e.g., transport, meals) Others	1
2025-10-22 22:24:46	2025-10-22 22:28:45	65	Female	Married	Secondary	Employed	Others	Stage O	Less than 6 months	Surgery	3	3	0	0	0	0	0	0	0	0	0	0	0		0	0	0	0	0	0	0	1	5	5	4	1	5	5	5	1	5	5	5	No	No	Always	Dissatisfied	Emotional support Financial support Information support Tangible assistance (e.g., transport, meals) Spiritual support	1
2025-10-22 22:28:46	2025-10-22 22:32:36	37	Female	Married	Secondary	Employed	Breast		6-12 months	Chemotherapy	3	2	0	0	0	0	0	0	0	0	0	3	0	0	0	0	0	0	0	0	0	2	5	5	5	1	5	5	5	1	5	5	5	No	No	Always	Very satisfied	Emotional support Financial support Information support Tangible assistance (e.g., transport, meals) Spiritual support	1
2025-10-22 22:32:36	2025-10-22 22:36:34	39	Female	Married	Secondary	Employed	Breast			Chemotherapy	0	0	0	0	0	3	3	0	0	0	0	0	0	0	0	0	3	0	0	0	0	5	5	1	5	1	5	5	5	5	5	5	5	No	No	Always	Very satisfied	Emotional support Financial support Information support Tangible assistance (e.g., transport, meals) Spiritual support	1
2025-10-22 22:36:34	2025-10-22 22:48:49	24	Female	Married	Secondary	Employed	Others		1-2 years	Surgery	0	3	0	0	3	3	3	0	0	0	2	3	0	0	2	0	1	0	3	0	0	5	5	1	5	1	5	5	5	5	5	5	5	Yes	Yes	Sometimes	Very satisfied	Emotional support Financial support Information support Tangible assistance (e.g., transport, meals) Spiritual support	1
2025-10-22 22:48:49	2025-10-22 22:52:41	47	Male	Married	Secondary	Employed	Others		Less than 6 months	Surgery	0	3	0	0	0	3	3	0	0	0	0	3	0	0	0	0	2	0	0	0	0	1	1	5	5	1	5	5	5	1	5	5	5	No	No	Always	Very satisfied	Emotional support Financial support Information support Tangible assistance (e.g., transport, meals) Spiritual support	1
[truncated: 17 more columns]
